# Supplementary material for: Exploring the Functional Basis of Epigenetic Aging in Relation to Body Fat Phenotypes in the Norfolk Island Cohort
Source: MDPI journal article supplement (doi:10.3390/cimb45100497), 2023-09-27
Supplement: s1 [file s1]

Supplementary Table S1 The summary statistic of significant probes associated with age ( $P < 2.4 \times 10^{-7}$ ) ordered by Chromosome and position.

| CpG        | Beta  | P       | R <sup>2</sup> | CHR | MAPINFO   | Gene            | feature | Known* |
|------------|-------|---------|----------------|-----|-----------|-----------------|---------|--------|
| cg20822990 | -0.58 | 4.6e-08 | 0.34           | 1   | 17338766  | <i>ATP13A2</i>  | TSS1500 | 1      |
| cg09793172 | 0.58  | 7.0e-08 | 0.33           | 1   | 21044101  | <i>KIF17</i>    | 1stExon | 0      |
| cg15728256 | 0.58  | 8.3e-08 | 0.33           | 1   | 40254184  | <i>BMP8B</i>    | 5'UTR   | 0      |
| cg18815943 | 0.62  | 3.6e-09 | 0.39           | 1   | 47882314  | <i>FOXE3</i>    | 1stExon | 1      |
| cg01281911 | 0.57  | 9.0e-08 | 0.33           | 1   | 47882686  | <i>FOXE3</i>    | 1stExon | 1      |
| cg06784991 | 0.68  | 2.4e-11 | 0.46           | 1   | 53308768  | <i>ZYG11A</i>   | Body    | 1      |
| cg24466241 | 0.56  | 2.2e-07 | 0.31           | 1   | 53308908  | <i>ZYG11A</i>   | Body    | 1      |
| cg10628205 | -0.66 | 1.4e-10 | 0.44           | 1   | 61547131  | <i>NFIA</i>     | Body    | 1      |
| cg12079303 | -0.57 | 1.0e-07 | 0.33           | 1   | 61547163  | <i>NFIA</i>     | Body    | 0      |
| cg23078123 | -0.65 | 4.7e-10 | 0.42           | 1   | 68577796  | <i>GPR177</i>   | Body    | 1      |
| cg20591472 | 0.62  | 3.9e-09 | 0.38           | 1   | 110008990 | <i>SYPL2</i>    | TSS200  | 1      |
| cg01974375 | -0.58 | 5.5e-08 | 0.34           | 1   | 151298954 | <i>PI4KB</i>    | TSS1500 | 1      |
| cg03890680 | -0.59 | 2.5e-08 | 0.35           | 1   | 227504721 | <i>CDC42BPA</i> | 1stExon | 1      |
| cg01557798 | 0.58  | 5.5e-08 | 0.34           | 1   | 228400628 | <i>OBSCN</i>    | Body    | 1      |
| cg09809672 | -0.56 | 1.8e-07 | 0.32           | 1   | 236557682 | <i>EDARADD</i>  | TSS1500 | 1      |
| cg03422911 | 0.59  | 2.5e-08 | 0.35           | 1   | 237205295 | <i>RYR2</i>     | TSS1500 | 1      |
| cg20491914 | 0.62  | 4.8e-09 | 0.38           | 2   | 26915349  | <i>KCNK3</i>    | TSS1500 | 0      |
| cg27320127 | 0.61  | 7.0e-09 | 0.37           | 2   | 47798396  | <i>KCNK12</i>   | TSS1500 | 1      |
| cg01968178 | 0.56  | 1.6e-07 | 0.32           | 2   | 86565038  | <i>REEP1</i>    | Body    | 1      |

|            |       |         |      |   |           |                |         |   |
|------------|-------|---------|------|---|-----------|----------------|---------|---|
| cg06639320 | 0.73  | 2.7e-13 | 0.53 | 2 | 106015739 | <i>FHL2</i>    | TSS200  | 1 |
| cg22454769 | 0.75  | 1.1e-14 | 0.57 | 2 | 106015767 | <i>FHL2</i>    | TSS200  | 1 |
| cg24079702 | 0.75  | 9.5e-15 | 0.57 | 2 | 106015771 | <i>FHL2</i>    | TSS200  | 1 |
| cg13381486 | 0.59  | 2.5e-08 | 0.35 | 2 | 131513632 | <i>FAM123C</i> | TSS1500 | 1 |
| cg23606718 | 0.74  | 5.3e-14 | 0.55 | 2 | 131513927 | <i>FAM123C</i> | 5'UTR   | 1 |
| cg00573770 | -0.61 | 8.4e-09 | 0.37 | 2 | 145278485 | <i>ZEB2</i>    | TSS1500 | 0 |
| cg00602811 | -0.59 | 2.9e-08 | 0.35 | 2 | 145278564 | <i>ZEB2</i>    | TSS1500 | 1 |
| cg18311633 | -0.58 | 5.0e-08 | 0.34 | 2 | 155309539 | <i>GALNT13</i> | 3'UTR   | 0 |
| cg12757011 | 0.64  | 7.8e-10 | 0.41 | 2 | 162281111 | <i>TBR1</i>    | 3'UTR   | 1 |
| cg01620164 | -0.62 | 2.8e-09 | 0.39 | 2 | 164590272 | <i>FIGN</i>    | Body    | 1 |
| cg03767531 | 0.62  | 3.2e-09 | 0.39 | 2 | 182545572 | <i>NEUROD1</i> | TSS200  | 0 |
| cg03545227 | 0.63  | 1.5e-09 | 0.4  | 2 | 220173100 | <i>PTPRN</i>   | Body    | 1 |
| cg23988310 | 0.59  | 3.0e-08 | 0.35 | 2 | 224467049 | <i>SCG2</i>    | 5'UTR   | 0 |
| cg12001304 | 0.61  | 1.0e-08 | 0.37 | 2 | 229045020 | <i>SPHKAP</i>  | Body    | 0 |
| cg24436906 | 0.57  | 1.4e-07 | 0.32 | 2 | 242498081 | <i>BOK</i>     | TSS200  | 1 |
| cg21117668 | 0.62  | 3.4e-09 | 0.39 | 2 | 242498349 | <i>BOK</i>     | 5'UTR   | 1 |
| cg22934295 | 0.62  | 5.2e-09 | 0.38 | 3 | 42306385  | <i>CCK</i>     | 1stExon | 0 |
| cg12091542 | 0.57  | 1.3e-07 | 0.32 | 3 | 48700425  | <i>CELSR3</i>  | TSS200  | 0 |
| cg16323609 | -0.58 | 4.5e-08 | 0.34 | 3 | 48885591  | <i>PRKAR2A</i> | TSS1500 | 0 |
| cg01844642 | 0.65  | 2.6e-10 | 0.43 | 3 | 51989764  | <i>GPR62</i>   | 1stExon | 1 |
| cg04474832 | -0.6  | 1.9e-08 | 0.36 | 3 | 52008487  | <i>ABHD14B</i> | 1stExon | 1 |
| cg03607117 | 0.67  | 1.0e-10 | 0.44 | 3 | 53080440  | <i>SFMBT1</i>  | TSS1500 | 1 |
| cg09379755 | 0.56  | 2.4e-07 | 0.31 | 3 | 62861925  | <i>CADPS</i>   | TSS1500 | 0 |

|            |       |         |      |   |           |                  |         |   |
|------------|-------|---------|------|---|-----------|------------------|---------|---|
| cg15618978 | 0.59  | 3.8e-08 | 0.34 | 3 | 160167990 | <i>TRIM59</i>    | TSS1500 | 1 |
| cg00481951 | 0.63  | 2.1e-09 | 0.39 | 3 | 187387650 | <i>SST</i>       | Body    | 1 |
| cg07963234 | 0.6   | 1.4e-08 | 0.36 | 4 | 5894923   | <i>CRMP1</i>     | TSS200  | 1 |
| cg15448975 | 0.63  | 2.0e-09 | 0.4  | 4 | 5894930   | <i>CRMP1</i>     | TSS200  | 1 |
| cg22680204 | 0.58  | 4.8e-08 | 0.34 | 4 | 5895098   | <i>CRMP1</i>     | TSS1500 | 0 |
| cg21523251 | 0.6   | 1.4e-08 | 0.36 | 4 | 8582110   | <i>GPR78</i>     | TSS200  | 0 |
| cg11970349 | 0.61  | 6.8e-09 | 0.37 | 4 | 8582287   | <i>GPR78</i>     | TSS200  | 1 |
| cg23995914 | 0.58  | 5.6e-08 | 0.34 | 4 | 10459228  | <i>ZNF518B</i>   | TSS200  | 1 |
| cg07809027 | -0.56 | 2.2e-07 | 0.31 | 4 | 15007205  | <i>CPEB2</i>     | Body    | 0 |
| cg18797590 | -0.56 | 2.2e-07 | 0.31 | 4 | 15480643  | <i>CC2D2A</i>    | Body    | 0 |
| cg20816447 | -0.57 | 9.4e-08 | 0.33 | 4 | 15480781  | <i>CC2D2A</i>    | Body    | 1 |
| cg13726191 | -0.59 | 3.3e-08 | 0.35 | 4 | 15940033  | <i>FGFBP1</i>    | TSS200  | 1 |
| cg24199834 | 0.58  | 6.3e-08 | 0.34 | 4 | 147560126 | <i>POU4F2</i>    | 1stExon | 1 |
| cg01102833 | -0.58 | 7.8e-08 | 0.33 | 4 | 176986621 | <i>WDR17</i>     | TSS1500 | 0 |
| cg25302419 | 0.62  | 3.9e-09 | 0.38 | 5 | 11904015  | <i>CTNND2</i>    | 5'UTR   | 0 |
| cg06782035 | 0.62  | 4.4e-09 | 0.38 | 5 | 16179135  | <i>MARCH11</i>   | Body    | 1 |
| cg23479922 | 0.57  | 1.4e-07 | 0.32 | 5 | 16179633  | <i>MARCH11</i>   | 1stExon | 1 |
| cg09017434 | 0.59  | 4.3e-08 | 0.34 | 5 | 16179660  | <i>MARCH11</i>   | 1stExon | 1 |
| cg12238343 | 0.58  | 4.9e-08 | 0.34 | 5 | 33936402  | <i>RXFP3</i>     | TSS200  | 1 |
| cg17621438 | -0.63 | 1.9e-09 | 0.4  | 5 | 63461216  | <i>RNF180</i>    | TSS1500 | 1 |
| cg07850154 | -0.63 | 1.3e-09 | 0.4  | 5 | 63461232  | <i>RNF180</i>    | TSS1500 | 1 |
| cg23008153 | -0.59 | 4.3e-08 | 0.34 | 5 | 63461305  | <i>RNF180</i>    | TSS1500 | 0 |
| cg12563644 | 0.65  | 2.5e-10 | 0.43 | 5 | 87956996  | <i>LOC645323</i> | Body    | 0 |

|            |       |         |      |   |           |                 |         |   |
|------------|-------|---------|------|---|-----------|-----------------|---------|---|
| cg11700800 | 0.61  | 6.2e-09 | 0.38 | 5 | 92906633  | <i>FLJ42709</i> | Body    | 0 |
| cg02699218 | 0.62  | 2.8e-09 | 0.39 | 5 | 132150128 | <i>ANKRD43</i>  | 1stExon | 1 |
| cg06448705 | 0.57  | 1.4e-07 | 0.32 | 5 | 135701094 | <i>TRPC7</i>    | 5'UTR   | 0 |
| cg21874213 | -0.61 | 8.6e-09 | 0.37 | 5 | 139229292 | <i>NRG2</i>     | Body    | 1 |
| cg13900817 | -0.59 | 2.7e-08 | 0.35 | 5 | 172070153 | <i>NEURL1B</i>  | Body    | 0 |
| cg06933824 | 0.59  | 4.0e-08 | 0.34 | 5 | 172110579 | <i>NEURL1B</i>  | Body    | 1 |
| cg16867657 | 0.8   | 1.4e-17 | 0.64 | 6 | 11044877  | <i>ELOVL2</i>   | TSS1500 | 1 |
| cg24724428 | 0.76  | 7.4e-15 | 0.57 | 6 | 11044888  | <i>ELOVL2</i>   | TSS1500 | 1 |
| cg21572722 | 0.74  | 4.7e-14 | 0.55 | 6 | 11044894  | <i>ELOVL2</i>   | TSS1500 | 1 |
| cg22736354 | 0.76  | 2.9e-15 | 0.58 | 6 | 18122719  | <i>NHLRC1</i>   | 1stExon | 1 |
| cg06493994 | 0.62  | 3.1e-09 | 0.39 | 6 | 25652602  | <i>SCGN</i>     | 1stExon | 1 |
| cg03236802 | 0.59  | 3.0e-08 | 0.35 | 6 | 32055316  | <i>TNXB</i>     | Body    | 1 |
| cg18651026 | -0.59 | 2.5e-08 | 0.35 | 6 | 33140660  | <i>COL11A2</i>  | Body    | 1 |
| cg08541518 | 0.68  | 1.9e-11 | 0.47 | 6 | 69942892  | <i>BAI3</i>     | Body    | 1 |
| cg01850269 | 0.59  | 2.7e-08 | 0.35 | 6 | 100903227 | <i>SIMI</i>     | Body    | 1 |
| cg03350900 | 0.65  | 5.1e-10 | 0.42 | 6 | 107955689 | <i>SOBP</i>     | Body    | 1 |
| cg02872426 | -0.65 | 4.8e-10 | 0.42 | 6 | 110736772 | <i>DDO</i>      | TSS200  | 1 |
| cg06413398 | -0.57 | 8.5e-08 | 0.33 | 6 | 110736865 | <i>DDO</i>      | TSS200  | 1 |
| cg07164639 | -0.59 | 4.0e-08 | 0.34 | 6 | 110736958 | <i>DDO</i>      | TSS1500 | 1 |
| cg14956327 | -0.58 | 4.7e-08 | 0.34 | 6 | 110737053 | <i>DDO</i>      | TSS1500 | 1 |
| cg20979799 | 0.58  | 6.3e-08 | 0.34 | 6 | 117198560 | <i>RFX6</i>     | 1stExon | 1 |
| cg12597389 | 0.57  | 1.0e-07 | 0.33 | 7 | 8482235   | <i>NXPH1</i>    | Body    | 1 |
| cg25962015 | -0.58 | 8.4e-08 | 0.33 | 7 | 26579291  | <i>KIAA0087</i> | TSS1500 | 0 |

|            |       |         |      |    |           |                  |         |   |
|------------|-------|---------|------|----|-----------|------------------|---------|---|
| cg24853724 | 0.62  | 3.6e-09 | 0.39 | 7  | 28997403  | <i>TRIL</i>      | 1stExon | 1 |
| cg09124496 | -0.59 | 3.6e-08 | 0.35 | 7  | 41735851  | <i>LOC285954</i> | Body    | 1 |
| cg10092878 | 0.59  | 3.6e-08 | 0.35 | 7  | 73038859  | <i>MLXIPL</i>    | 1stExon | 0 |
| cg00503840 | 0.56  | 2.2e-07 | 0.31 | 7  | 96650509  | <i>DLX5</i>      | Body    | 1 |
| cg01287975 | 0.58  | 5.4e-08 | 0.34 | 7  | 97361241  | <i>TAC1</i>      | TSS200  | 1 |
| cg08904363 | 0.61  | 1.1e-08 | 0.37 | 7  | 102790119 | <i>NAPEPLD</i>   | TSS1500 | 0 |
| cg04528819 | 0.56  | 2.0e-07 | 0.31 | 7  | 130418315 | <i>KLF14</i>     | 1stExon | 1 |
| cg00094518 | 0.63  | 1.7e-09 | 0.4  | 7  | 130418549 | <i>KLF14</i>     | 1stExon | 0 |
| cg14361627 | 0.75  | 1.6e-14 | 0.56 | 7  | 130419116 | <i>KLF14</i>     | TSS1500 | 1 |
| cg07955995 | 0.6   | 1.4e-08 | 0.36 | 7  | 130419159 | <i>KLF14</i>     | TSS1500 | 1 |
| cg00292135 | 0.63  | 1.5e-09 | 0.4  | 7  | 156433068 | <i>C7orf13</i>   | Body    | 0 |
| cg07927379 | 0.63  | 1.6e-09 | 0.4  | 7  | 156433108 | <i>C7orf13</i>   | Body    | 1 |
| cg23636833 | -0.57 | 1.2e-07 | 0.32 | 7  | 157514822 | <i>PTPRN2</i>    | Body    | 0 |
| cg26330518 | 0.58  | 6.2e-08 | 0.34 | 8  | 24770342  | <i>NEFM</i>      | TSS1500 | 0 |
| cg07502389 | 0.66  | 1.5e-10 | 0.44 | 8  | 24771259  | <i>NEFM</i>      | TSS200  | 1 |
| cg18267374 | 0.61  | 1.0e-08 | 0.37 | 8  | 24771273  | <i>NEFM</i>      | TSS1500 | 1 |
| cg07583137 | -0.56 | 2.1e-07 | 0.31 | 8  | 82644012  | <i>CHMP4C</i>    | TSS1500 | 1 |
| cg26290632 | 0.65  | 4.2e-10 | 0.42 | 8  | 91094847  | <i>CALB1</i>     | 1stExon | 1 |
| cg04436528 | -0.61 | 5.6e-09 | 0.38 | 8  | 143554875 | <i>BAIL</i>      | Body    | 0 |
| cg21159778 | 0.59  | 2.7e-08 | 0.35 | 9  | 117266918 | <i>DFNB31</i>    | TSS1500 | 1 |
| cg14058848 | -0.59 | 4.2e-08 | 0.34 | 9  | 130479114 | <i>TTC16</i>     | Body    | 0 |
| cg09642020 | -0.61 | 1.1e-08 | 0.37 | 9  | 139379173 | <i>C9orf163</i>  | 1stExon | 1 |
| cg12610471 | 0.59  | 4.1e-08 | 0.34 | 10 | 22634199  | <i>SPAG6</i>     | TSS200  | 1 |

|            |       |         |      |    |           |                      |         |   |
|------------|-------|---------|------|----|-----------|----------------------|---------|---|
| cg12377139 | 0.6   | 1.5e-08 | 0.36 | 10 | 22634218  | <i>SPAG6</i>         | TSS200  | 1 |
| cg16541931 | 0.59  | 3.8e-08 | 0.34 | 10 | 25463757  | <i>LOC100128811</i>  | Body    | 1 |
| cg04599297 | 0.58  | 6.0e-08 | 0.34 | 10 | 26505442  | <i>GAD2</i>          | 5'UTR   | 0 |
| cg24350475 | -0.58 | 8.1e-08 | 0.33 | 10 | 30316933  | <i>KIAA1462</i>      | Body    | 1 |
| cg22796704 | -0.65 | 2.6e-10 | 0.43 | 10 | 49673534  | <i>ARHGAP22</i>      | Body    | 1 |
| cg10056132 | 0.67  | 4.3e-11 | 0.46 | 10 | 50887731  | <i>C10orf53</i>      | 5'UTR   | 1 |
| cg18738190 | -0.57 | 1.2e-07 | 0.32 | 10 | 73740291  | <i>CHST3</i>         | 5'UTR   | 1 |
| cg14209784 | -0.62 | 4.8e-09 | 0.38 | 10 | 88729861  | <i>AGAP11</i>        | TSS1500 | 1 |
| cg19991948 | -0.6  | 1.5e-08 | 0.36 | 10 | 121335173 | <i>TIAL1</i>         | 3'UTR   | 1 |
| cg20012537 | -0.6  | 1.3e-08 | 0.36 | 10 | 134928794 | <i>GPR123</i>        | Body    | 1 |
| cg07080372 | -0.71 | 1.7e-12 | 0.5  | 11 | 796607    | <i>SLC25A22</i>      | TSS1500 | 1 |
| cg05267118 | -0.62 | 5.2e-09 | 0.38 | 11 | 2907884   | <i>CDKN1C</i>        | TSS1500 | 0 |
| cg23091758 | 0.59  | 2.9e-08 | 0.35 | 11 | 9025767   | <i>NRIP3</i>         | TSS200  | 1 |
| cg05923914 | -0.56 | 2.3e-07 | 0.31 | 11 | 45792610  | <i>DKFZp779M0652</i> | TSS1500 | 1 |
| cg19589811 | 0.62  | 5.4e-09 | 0.38 | 11 | 82443961  | <i>FAM181B</i>       | 1stExon | 0 |
| cg00202702 | 0.57  | 8.5e-08 | 0.33 | 11 | 101918157 | <i>C11orf70</i>      | TSS200  | 1 |
| cg02423574 | -0.57 | 9.4e-08 | 0.33 | 11 | 119066560 | <i>CCDC153</i>       | 1stExon | 1 |
| cg11141380 | 0.56  | 2.2e-07 | 0.31 | 11 | 122852417 | <i>BSX</i>           | TSS200  | 0 |
| cg16983588 | -0.61 | 9.8e-09 | 0.37 | 11 | 129793108 | <i>PRDM10</i>        | Body    | 1 |
| cg08622677 | 0.64  | 9.4e-10 | 0.41 | 12 | 3601306   | <i>PRMT8</i>         | Body    | 1 |
| cg19056004 | -0.63 | 1.8e-09 | 0.4  | 12 | 7023262   | <i>LRRC23</i>        | 3'UTR   | 1 |
| cg04604946 | -0.61 | 8.0e-09 | 0.37 | 12 | 7023352   | <i>LRRC23</i>        | 3'UTR   | 1 |
| cg15626285 | -0.62 | 3.3e-09 | 0.39 | 12 | 7167781   | <i>CIS</i>           | TSS200  | 1 |

|            |       |         |      |    |           |                 |         |   |
|------------|-------|---------|------|----|-----------|-----------------|---------|---|
| cg13942826 | -0.57 | 1.4e-07 | 0.32 | 12 | 11002609  | <i>PRR4</i>     | TSS1500 | 1 |
| cg05242244 | -0.62 | 5.5e-09 | 0.38 | 12 | 53553086  | <i>CSAD</i>     | Body    | 1 |
| cg17436656 | -0.6  | 2.1e-08 | 0.36 | 12 | 53627106  | <i>RARG</i>     | TSS1500 | 1 |
| cg22358580 | 0.58  | 8.1e-08 | 0.33 | 12 | 54426725  | <i>HOXC4</i>    | 5'UTR   | 1 |
| cg18473521 | 0.6   | 1.4e-08 | 0.36 | 12 | 54448265  | <i>HOXC4</i>    | Body    | 1 |
| cg25778262 | 0.62  | 5.5e-09 | 0.38 | 12 | 69327449  | <i>CPM</i>      | TSS1500 | 0 |
| cg11649376 | -0.73 | 1.1e-13 | 0.54 | 12 | 81473234  | <i>ACSS3</i>    | Body    | 1 |
| cg08888956 | -0.65 | 3.5e-10 | 0.42 | 12 | 86267839  | <i>NTS</i>      | TSS1500 | 0 |
| cg12878812 | 0.64  | 6.9e-10 | 0.41 | 12 | 119419696 | <i>SRRM4</i>    | 1stExon | 1 |
| cg11826475 | -0.58 | 6.7e-08 | 0.33 | 12 | 120704006 | <i>PXN</i>      | TSS1500 | 1 |
| cg09972864 | 0.67  | 5.4e-11 | 0.45 | 13 | 22248760  | <i>FGF9</i>     | Body    | 0 |
| cg18236477 | 0.6   | 1.2e-08 | 0.37 | 13 | 26043066  | <i>ATP8A2</i>   | Body    | 1 |
| cg26685941 | -0.58 | 6.3e-08 | 0.34 | 13 | 95952902  | <i>ABCC4</i>    | Body    | 1 |
| cg05412028 | -0.61 | 7.6e-09 | 0.37 | 13 | 95952937  | <i>ABCC4</i>    | Body    | 1 |
| cg00743094 | 0.56  | 2.1e-07 | 0.31 | 13 | 100547968 | <i>CLYBL</i>    | 3'UTR   | 0 |
| cg07416237 | 0.57  | 1.4e-07 | 0.32 | 13 | 100548078 | <i>CLYBL</i>    | 3'UTR   | 1 |
| cg13917662 | 0.56  | 2.1e-07 | 0.31 | 13 | 100548513 | <i>CLYBL</i>    | 3'UTR   | 1 |
| cg05404236 | 0.56  | 2.4e-07 | 0.31 | 13 | 110437093 | <i>IRS2</i>     | 1stExon | 1 |
| cg25078444 | 0.59  | 3.0e-08 | 0.35 | 14 | 29235193  | <i>FOXC1</i>    | TSS1500 | 1 |
| cg01302656 | 0.64  | 7.8e-10 | 0.41 | 14 | 29254853  | <i>C14orf23</i> | Body    | 1 |
| cg07850604 | 0.65  | 2.7e-10 | 0.43 | 14 | 36003443  | <i>INSM2</i>    | 5'UTR   | 1 |
| cg14836018 | -0.61 | 6.8e-09 | 0.37 | 14 | 51706425  | <i>TMX1</i>     | TSS1500 | 1 |
| cg02583151 | 0.57  | 1.0e-07 | 0.33 | 14 | 61116211  | <i>SIX1</i>     | TSS200  | 0 |

|            |       |         |      |    |           |                 |         |   |
|------------|-------|---------|------|----|-----------|-----------------|---------|---|
| cg06934523 | -0.61 | 5.7e-09 | 0.38 | 14 | 70077930  | <i>KIAA0247</i> | TSS1500 | 0 |
| cg23998119 | 0.61  | 8.4e-09 | 0.37 | 14 | 77600217  | <i>ZDHHC22</i>  | Body    | 1 |
| cg15480367 | 0.6   | 2.2e-08 | 0.35 | 14 | 93389485  | <i>CHGA</i>     | 5'UTR   | 1 |
| cg12422450 | 0.57  | 1.4e-07 | 0.32 | 14 | 93389891  | <i>CHGA</i>     | Body    | 1 |
| cg15341124 | 0.59  | 2.4e-08 | 0.35 | 14 | 102027734 | <i>DIO3</i>     | 5'UTR   | 1 |
| cg01763090 | 0.71  | 1.9e-12 | 0.5  | 15 | 31775406  | <i>OTUD7A</i>   | 3'UTR   | 1 |
| cg04875128 | 0.78  | 2.6e-16 | 0.61 | 15 | 31775895  | <i>OTUD7A</i>   | Body    | 1 |
| cg21296230 | 0.57  | 1.6e-07 | 0.32 | 15 | 33010536  | <i>GREM1</i>    | 5'UTR   | 1 |
| cg25826226 | 0.56  | 2.2e-07 | 0.31 | 15 | 41953061  | <i>MGA</i>      | 5'UTR   | 0 |
| cg16717122 | 0.57  | 1.0e-07 | 0.33 | 15 | 51973920  | <i>SCG3</i>     | 5'UTR   | 1 |
| cg07931844 | -0.6  | 1.5e-08 | 0.36 | 15 | 72102213  | <i>NR2E3</i>    | TSS1500 | 1 |
| cg21801378 | 0.61  | 6.3e-09 | 0.38 | 15 | 72612125  | <i>BRUNOL6</i>  | 1stExon | 1 |
| cg20809087 | 0.56  | 2.0e-07 | 0.32 | 15 | 72612221  | <i>BRUNOL6</i>  | 5'UTR   | 1 |
| cg27552679 | 0.6   | 1.3e-08 | 0.36 | 15 | 74425757  | <i>ISLR2</i>    | Body    | 0 |
| cg27569300 | 0.66  | 1.3e-10 | 0.44 | 15 | 99645065  | <i>SYNM</i>     | TSS1500 | 1 |
| cg01797043 | -0.61 | 6.3e-09 | 0.38 | 16 | 2004686   | <i>RPL3L</i>    | TSS200  | 1 |
| cg11220950 | 0.57  | 1.0e-07 | 0.33 | 16 | 2042693   | <i>SYNGR3</i>   | Body    | 1 |
| cg27269561 | -0.56 | 1.9e-07 | 0.32 | 16 | 3072713   | <i>HCFC1R1</i>  | 3'UTR   | 0 |
| cg03136323 | -0.56 | 2.2e-07 | 0.31 | 16 | 19195100  | <i>SYT17</i>    | Body    | 0 |
| cg00448560 | -0.61 | 6.0e-09 | 0.38 | 16 | 49525727  | <i>ZNF423</i>   | Body    | 1 |
| cg04229059 | -0.6  | 2.2e-08 | 0.35 | 16 | 58718971  | <i>SLC38A7</i>  | TSS1500 | 1 |
| cg06279276 | 0.61  | 6.2e-09 | 0.38 | 16 | 67184164  | <i>B3GNT9</i>   | Body    | 1 |
| cg09636661 | -0.58 | 6.2e-08 | 0.34 | 16 | 69743901  | <i>NQO1</i>     | 3'UTR   | 1 |



|            |       |         |      |    |          |                  |         |   |
|------------|-------|---------|------|----|----------|------------------|---------|---|
| cg06086177 | -0.58 | 4.8e-08 | 0.34 | 16 | 73090646 | <i>ZFHX3</i>     | 5'UTR   | 0 |
| cg04987608 | 0.59  | 3.0e-08 | 0.35 | 16 | 75300043 | <i>BCAR1</i>     | TSS200  | 0 |
| cg00551679 | 0.57  | 1.3e-07 | 0.32 | 16 | 86547530 | <i>FOXF1</i>     | 3'UTR   | 0 |
| cg04503319 | -0.58 | 5.8e-08 | 0.34 | 16 | 89368367 | <i>ANKRD11</i>   | Body    | 1 |
| cg17457912 | -0.57 | 1.4e-07 | 0.32 | 17 | 1617102  | <i>C17orf91</i>  | Body    | 1 |
| cg10137837 | 0.62  | 3.9e-09 | 0.38 | 17 | 6926742  | <i>BCL6B</i>     | 5'UTR   | 1 |
| cg13029847 | 0.6   | 2.2e-08 | 0.35 | 17 | 27333273 | <i>SEZ6</i>      | TSS200  | 1 |
| cg14692377 | 0.69  | 6.5e-12 | 0.48 | 17 | 28562685 | <i>SLC6A4</i>    | 1stExon | 1 |
| cg06247837 | -0.57 | 1.0e-07 | 0.33 | 17 | 37820135 | <i>TCAP</i>      | TSS1500 | 1 |
| cg22156456 | -0.58 | 6.5e-08 | 0.34 | 17 | 39844239 | <i>EIF1</i>      | TSS1500 | 1 |
| cg24212517 | -0.57 | 1.4e-07 | 0.32 | 17 | 42428168 | <i>GRN</i>       | Body    | 0 |
| cg12892303 | 0.56  | 1.8e-07 | 0.32 | 17 | 42733592 | <i>C17orf104</i> | TSS200  | 1 |
| cg12781700 | 0.57  | 8.7e-08 | 0.33 | 17 | 42733729 | <i>C17orf104</i> | TSS200  | 0 |
| cg20396069 | -0.58 | 7.4e-08 | 0.33 | 17 | 46908122 | <i>CALCOCO2</i>  | TSS1500 | 0 |
| cg24847230 | -0.63 | 1.7e-09 | 0.4  | 17 | 46986807 | <i>UBE2Z</i>     | Body    | 1 |
| cg18618815 | -0.58 | 8.4e-08 | 0.33 | 17 | 48275324 | <i>COL1A1</i>    | Body    | 1 |
| cg11071401 | 0.73  | 2.7e-13 | 0.53 | 17 | 48637194 | <i>CACNA1G</i>   | TSS1500 | 1 |
| cg16477091 | 0.64  | 1.1e-09 | 0.4  | 17 | 56833000 | <i>PPM1E</i>     | TSS1500 | 1 |
| cg07584066 | 0.62  | 5.0e-09 | 0.38 | 17 | 57642749 | <i>DHX40</i>     | TSS200  | 1 |
| cg16969368 | 0.59  | 3.0e-08 | 0.35 | 17 | 57642752 | <i>DHX40</i>     | TSS200  | 0 |
| cg26897150 | 0.6   | 2.2e-08 | 0.35 | 17 | 57642763 | <i>DHX40</i>     | TSS200  | 0 |
| cg07365960 | 0.57  | 9.8e-08 | 0.33 | 17 | 72848535 | <i>GRIN2C</i>    | Body    | 1 |
| cg00439658 | 0.62  | 5.3e-09 | 0.38 | 17 | 72848669 | <i>GRIN2C</i>    | Body    | 1 |

|            |       |         |      |    |          |                 |         |   |
|------------|-------|---------|------|----|----------|-----------------|---------|---|
| cg05776388 | 0.62  | 4.4e-09 | 0.38 | 17 | 72983414 | <i>CDR2L</i>    | TSS1500 | 0 |
| cg17024199 | -0.58 | 7.0e-08 | 0.33 | 17 | 74881747 | <i>MGAT5B</i>   | Body    | 1 |
| cg01502244 | -0.57 | 1.3e-07 | 0.32 | 17 | 78188904 | <i>SGSH</i>     | Body    | 0 |
| cg19761273 | -0.61 | 7.1e-09 | 0.37 | 17 | 80232096 | <i>CSNK1D</i>   | TSS1500 | 1 |
| cg23718736 | -0.57 | 1.1e-07 | 0.33 | 18 | 6413908  | <i>L3MBTL4</i>  | 5'UTR   | 1 |
| cg03614193 | 0.6   | 1.3e-08 | 0.36 | 18 | 55021542 | <i>ST8SLA3</i>  | Body    | 1 |
| cg19283806 | -0.71 | 1.4e-12 | 0.5  | 18 | 66389420 | <i>CCDC102B</i> | 5'UTR   | 1 |
| cg17471102 | -0.59 | 3.6e-08 | 0.35 | 19 | 5851255  | <i>FUT3</i>     | 5'UTR   | 1 |
| cg08694544 | 0.62  | 4.3e-09 | 0.38 | 19 | 12946228 | <i>RTBDN</i>    | 1stExon | 0 |
| cg14556683 | 0.69  | 7.3e-12 | 0.48 | 19 | 15342982 | <i>EPHX3</i>    | 1stExon | 1 |
| cg19784428 | -0.6  | 2.0e-08 | 0.36 | 19 | 16830746 | <i>NWD1</i>     | TSS200  | 1 |
| cg19344626 | -0.58 | 6.9e-08 | 0.33 | 19 | 16830749 | <i>NWD1</i>     | TSS200  | 1 |
| cg01580888 | 0.57  | 1.5e-07 | 0.32 | 19 | 33556060 | <i>RHPN2</i>    | TSS1500 | 1 |
| cg05346491 | -0.6  | 1.9e-08 | 0.36 | 19 | 48917104 | <i>GRIN2D</i>   | Body    | 1 |
| cg04731544 | 0.57  | 1.1e-07 | 0.33 | 19 | 49004834 | <i>LMTK3</i>    | Body    | 1 |
| cg19593767 | 0.58  | 5.8e-08 | 0.34 | 20 | 42544666 | <i>TOX2</i>     | TSS200  | 1 |
| cg19702785 | 0.71  | 1.9e-12 | 0.5  | 20 | 43727089 | <i>KCNS1</i>    | Body    | 1 |
| cg06369624 | 0.57  | 9.6e-08 | 0.33 | 20 | 43727355 | <i>KCNS1</i>    | Body    | 0 |
| cg07547549 | 0.65  | 4.7e-10 | 0.42 | 20 | 44658225 | <i>SLC12A5</i>  | Body    | 1 |
| cg00387658 | -0.62 | 5.3e-09 | 0.38 | 20 | 54986793 | <i>CASS4</i>    | TSS1500 | 1 |
| cg14374829 | 0.58  | 4.4e-08 | 0.34 | 21 | 33244742 | <i>HUNK</i>     | TSS1500 | 0 |
| cg07127410 | -0.58 | 7.7e-08 | 0.33 | 22 | 29427851 | <i>ZNRF3</i>    | Body    | 0 |
| cg21064451 | -0.57 | 1.2e-07 | 0.32 | 22 | 38071534 | <i>LGALS1</i>   | TSS200  | 0 |

|  |  |  |  |  |  |  |                                                                                                                                                                    |  |
|--|--|--|--|--|--|--|--------------------------------------------------------------------------------------------------------------------------------------------------------------------|--|
|  |  |  |  |  |  |  | <i>Beta:</i><br><i>standardized</i><br><i>regression</i><br><i>coefficients</i><br><i>*: knwon</i><br><i>age-related</i><br><i>CpG ( No =</i><br><i>0; Yes =1)</i> |  |
|--|--|--|--|--|--|--|--------------------------------------------------------------------------------------------------------------------------------------------------------------------|--|

Supplementary Table S2 Age-related eCpGs

| CpG        | Transcript   | CpG    |         | Transcript |         | CpG x Transcript |         | R2   | CHR | MAPINFO   | Gene           | feature | r <sup>a</sup> | index | Known <sup>b</sup> |
|------------|--------------|--------|---------|------------|---------|------------------|---------|------|-----|-----------|----------------|---------|----------------|-------|--------------------|
|            |              | Beta   | P       | Beta       | P       | Beta             | P       |      |     |           |                |         |                |       |                    |
| cg07198402 | ILMN_1749667 | 8.69   | 2.4e-02 | 10.48      | 2.0e-02 | -14.3            | 2.0e-02 | 0.17 | 1   | 228395145 | <i>OBSCN</i>   | TSS1500 | 0.07           | y     | 0                  |
| cg07600278 | ILMN_1749667 | 8.39   | 4.6e-02 | 14.71      | 4.4e-02 | -16.67           | 4.4e-02 | 0.06 | 1   | 228548163 | <i>OBSCN</i>   | Body    | -0.04          | n     | 0                  |
| cg13539203 | ILMN_1768483 | 9.55   | 7.8e-03 | 10.02      | 7.8e-03 | -14.08           | 7.1e-03 | 0.12 | 2   | 26950545  | <i>KCNK3</i>   | Body    | 0.01           | y     | 0                  |
| cg10666081 | ILMN_2355831 | -6.92  | 8.4e-03 | -12.79     | 1.2e-02 | 14.17            | 1.1e-02 | 0.17 | 2   | 105985002 | <i>FHL2</i>    | Body    | -0.05          | y     | 0                  |
| cg06907053 | ILMN_1668411 | 6.63   | 3.2e-02 | 2.37       | 2.9e-02 | -6.96            | 3.5e-02 | 0.09 | 2   | 106015869 | <i>FHL2</i>    | TSS200  | 0.04           | n     | 0                  |
| cg08239282 | ILMN_2355831 | -7.99  | 1.5e-02 | -19.35     | 1.8e-02 | 19.98            | 1.7e-02 | 0.12 | 2   | 106026162 | <i>FHL2</i>    | 5'UTR   | -0.13          | n     | 0                  |
| cg08239282 | ILMN_1668411 | -7.22  | 2.8e-02 | -17.36     | 3.4e-02 | 18.88            | 3.3e-02 | 0.11 | 2   | 106026162 | <i>FHL2</i>    | 5'UTR   | 0.01           | n     | 0                  |
| cg12336777 | ILMN_1688698 | 4.85   | 2.8e-02 | 1.52       | 1.5e-02 | -5.22            | 2.9e-02 | 0.1  | 2   | 145210222 | <i>ZEB2</i>    | Body    | 0.18           | n     | 0                  |
| cg12571570 | ILMN_1820767 | -8.91  | 2.8e-02 | -2.76      | 4.9e-02 | 9                | 3.0e-02 | 0.16 | 2   | 145267984 | <i>ZEB2</i>    | Body    | -0.09          | n     | 0                  |
| cg23095192 | ILMN_1820767 | -8.89  | 1.9e-02 | -3.94      | 3.2e-02 | 8.89             | 2.2e-02 | 0.2  | 2   | 145271307 | <i>ZEB2</i>    | Body    | -0.19          | y     | 0                  |
| cg07246225 | ILMN_1688698 | 5.49   | 2.6e-02 | 1.77       | 1.8e-02 | -5.53            | 3.2e-02 | 0.14 | 2   | 145277659 | <i>ZEB2</i>    | Body    | 0.01           | n     | 0                  |
| cg14421309 | ILMN_1820767 | -10.41 | 4.5e-03 | -1.76      | 1.4e-02 | 10.87            | 4.2e-03 | 0.19 | 2   | 145277734 | <i>ZEB2</i>    | Body    | 0.1            | n     | 0                  |
| cg12974733 | ILMN_1739366 | -5.3   | 1.2e-02 | -1.24      | 1.5e-02 | 5.79             | 1.0e-02 | 0.1  | 2   | 162273524 | <i>TBR1</i>    | 1stExon | 0.19           | n     | 0                  |
| cg22743761 | ILMN_1739366 | -5.7   | 3.2e-02 | -2.22      | 2.7e-02 | 6.85             | 2.6e-02 | 0.11 | 2   | 162273648 | <i>TBR1</i>    | Body    | 0.26           | y     | 0                  |
| cg03578473 | ILMN_1669425 | -9.72  | 1.3e-02 | -1.15      | 1.3e-02 | 9.9              | 1.2e-02 | 0.09 | 2   | 182546504 | <i>NEUROD1</i> | TSS1500 | 0.05           | y     | 0                  |
| cg20671534 | ILMN_1658576 | -6.04  | 6.5e-03 | -2.56      | 1.2e-02 | 6.65             | 8.8e-03 | 0.15 | 2   | 220174629 | <i>PTPRN</i>   | TSS1500 | 0.12           | y     | 0                  |
| cg21126969 | ILMN_2391750 | 4.56   | 4.5e-02 | 7.6        | 2.9e-02 | -10.02           | 3.1e-02 | 0.17 | 3   | 53030684  | <i>SFMBT1</i>  | 5'UTR   | 0.28           | n     | 0                  |
| cg12962167 | ILMN_2391750 | 5.11   | 3.2e-02 | 13.97      | 3.0e-02 | -14.23           | 3.1e-02 | 0.07 | 3   | 53033115  | <i>SFMBT1</i>  | 5'UTR   | -0.13          | n     | 0                  |
| cg17761990 | ILMN_1741585 | 8.07   | 6.4e-03 | 11.07      | 5.7e-03 | -14.09           | 5.4e-03 | 0.14 | 3   | 53042940  | <i>SFMBT1</i>  | 5'UTR   | 0.03           | n     | 0                  |
| cg17761990 | ILMN_2391750 | 8.32   | 1.4e-03 | 14.69      | 1.0e-03 | -17.13           | 1.1e-03 | 0.17 | 3   | 53042940  | <i>SFMBT1</i>  | 5'UTR   | 0.03           | y     | 0                  |
| cg24445507 | ILMN_2391750 | 4.55   | 2.6e-02 | 11.38      | 1.9e-02 | -12.15           | 1.9e-02 | 0.12 | 3   | 53044901  | <i>SFMBT1</i>  | 5'UTR   | -0.04          | n     | 0                  |
| cg04503182 | ILMN_2391750 | 4.36   | 3.5e-02 | 8.54       | 2.6e-02 | -9.05            | 2.5e-02 | 0.13 | 3   | 53078218  | <i>SFMBT1</i>  | 5'UTR   | -0.16          | n     | 0                  |
| cg20332195 | ILMN_1682449 | -10.72 | 9.2e-03 | -2.15      | 9.0e-03 | 11.19            | 7.3e-03 | 0.2  | 4   | 10459929  | <i>ZNF518B</i> | TSS1500 | -0.04          | y     | 0                  |

|            |              |        |         |        |         |        |         |      |   |           |                |         |       |   |   |
|------------|--------------|--------|---------|--------|---------|--------|---------|------|---|-----------|----------------|---------|-------|---|---|
| cg03463279 | ILMN_1774948 | 6.11   | 4.4e-02 | 2.1    | 2.7e-02 | -6.44  | 4.4e-02 | 0.1  | 4 | 15004942  | <i>CPEB2</i>   | TSS1500 | 0.04  | n | 0 |
| cg19929852 | ILMN_1774948 | 9.08   | 1.0e-02 | 13.15  | 8.6e-03 | -15.21 | 9.6e-03 | 0.14 | 4 | 15068643  | <i>CPEB2</i>   | 3'UTR   | -0.08 | y | 0 |
| cg10512498 | ILMN_1746552 | 6.42   | 2.4e-02 | 7.42   | 2.2e-02 | -9.27  | 2.1e-02 | 0.1  | 4 | 176986333 | <i>WDR17</i>   | TSS1500 | -0.14 | n | 0 |
| cg18443378 | ILMN_1746552 | -5.65  | 4.2e-02 | -1.52  | 3.1e-02 | 6.09   | 3.2e-02 | 0.16 | 4 | 176986950 | <i>WDR17</i>   | TSS200  | -0.04 | y | 0 |
| cg14782559 | ILMN_1721178 | -10.87 | 2.5e-03 | -0.79  | 8.2e-03 | 10.9   | 2.9e-03 | 0.14 | 6 | 33131893  | <i>COL11A2</i> | Body    | 0.21  | n | 0 |
| cg20506659 | ILMN_1721178 | 8.82   | 4.9e-02 | 4.65   | 4.4e-02 | -9.37  | 4.1e-02 | 0.16 | 6 | 33132943  | <i>COL11A2</i> | Body    | -0.22 | n | 0 |
| cg02667414 | ILMN_1748166 | 9.52   | 3.5e-02 | 11.59  | 3.5e-02 | -14.54 | 3.3e-02 | 0.09 | 6 | 33133517  | <i>COL11A2</i> | Body    | -0.08 | n | 0 |
| cg06924878 | ILMN_1748166 | 8.56   | 1.9e-02 | 3.81   | 2.0e-02 | -9.43  | 1.7e-02 | 0.12 | 6 | 33134045  | <i>COL11A2</i> | Body    | -0.04 | n | 0 |
| cg14812123 | ILMN_1748166 | 6.99   | 3.3e-02 | 12.68  | 3.2e-02 | -14.46 | 3.0e-02 | 0.09 | 6 | 33135284  | <i>COL11A2</i> | Body    | -0.03 | n | 0 |
| cg00933415 | ILMN_1748166 | 7.66   | 1.9e-02 | 9.42   | 1.7e-02 | -12.81 | 1.6e-02 | 0.14 | 6 | 33135453  | <i>COL11A2</i> | Body    | 0.07  | n | 0 |
| cg25482983 | ILMN_1748166 | 7.71   | 4.6e-02 | 7.81   | 4.4e-02 | -10.68 | 4.1e-02 | 0.1  | 6 | 33135756  | <i>COL11A2</i> | Body    | -0.09 | n | 0 |
| cg22748722 | ILMN_1748166 | 7.31   | 4.1e-02 | 8.9    | 3.8e-02 | -11.59 | 3.6e-02 | 0.11 | 6 | 33135868  | <i>COL11A2</i> | Body    | -0.03 | n | 0 |
| cg24158878 | ILMN_1721178 | 10.62  | 2.7e-02 | 2.2    | 2.9e-02 | -10.58 | 2.9e-02 | 0.07 | 6 | 33137570  | <i>COL11A2</i> | Body    | -0.08 | n | 0 |
| cg02673107 | ILMN_1721178 | 14.88  | 3.3e-04 | 5.68   | 3.2e-04 | -15.09 | 2.9e-04 | 0.19 | 6 | 33138131  | <i>COL11A2</i> | Body    | -0.18 | n | 0 |
| cg18651026 | ILMN_1748166 | 5.35   | 4.3e-02 | 3.16   | 2.9e-02 | -6.87  | 2.5e-02 | 0.4  | 6 | 33140660  | <i>COL11A2</i> | Body    | 0.04  | y | 1 |
| cg20974826 | ILMN_1721178 | 8.78   | 3.0e-02 | 5.44   | 2.6e-02 | -9.7   | 2.5e-02 | 0.15 | 6 | 33141040  | <i>COL11A2</i> | Body    | -0.18 | n | 1 |
| cg00350615 | ILMN_1721178 | 8.5    | 5.0e-02 | 3.64   | 4.7e-02 | -8.98  | 4.5e-02 | 0.09 | 6 | 33141152  | <i>COL11A2</i> | Body    | -0.13 | n | 1 |
| cg13224161 | ILMN_1721178 | 12.94  | 6.2e-03 | 2.39   | 6.6e-03 | -13.01 | 6.0e-03 | 0.1  | 6 | 33141279  | <i>COL11A2</i> | Body    | -0.09 | n | 0 |
| cg00115458 | ILMN_1721178 | 11.18  | 5.6e-03 | 2.35   | 5.5e-03 | -11.47 | 4.9e-03 | 0.14 | 6 | 33141305  | <i>COL11A2</i> | Body    | -0.06 | n | 0 |
| cg11960243 | ILMN_1721178 | 12.85  | 2.8e-03 | 1.34   | 3.6e-03 | -12.59 | 3.1e-03 | 0.13 | 6 | 33143135  | <i>COL11A2</i> | Body    | -0.16 | n | 0 |
| cg21771125 | ILMN_1721178 | -8.02  | 3.5e-02 | -8     | 4.4e-02 | 11.41  | 4.4e-02 | 0.17 | 6 | 33149047  | <i>COL11A2</i> | Body    | 0.06  | n | 0 |
| cg03260211 | ILMN_1721178 | -8.1   | 3.9e-02 | -7.37  | 4.5e-02 | 12.22  | 4.3e-02 | 0.09 | 6 | 33151921  | <i>COL11A2</i> | Body    | 0.27  | n | 0 |
| cg04182805 | ILMN_1748166 | 9.23   | 3.0e-02 | 19.44  | 2.7e-02 | -22.09 | 2.7e-02 | 0.11 | 6 | 33154830  | <i>COL11A2</i> | Body    | 0.05  | n | 0 |
| cg21509966 | ILMN_1748166 | 5.94   | 2.8e-02 | 10.88  | 2.6e-02 | -12.61 | 2.5e-02 | 0.1  | 6 | 33156463  | <i>COL11A2</i> | Body    | 0.01  | n | 0 |
| cg11835806 | ILMN_1721178 | -8.41  | 2.9e-02 | -12.32 | 3.3e-02 | 15.44  | 3.3e-02 | 0.1  | 6 | 33156836  | <i>COL11A2</i> | Body    | 0.09  | n | 0 |
| cg24936204 | ILMN_1721178 | 7.8    | 4.1e-02 | 5.24   | 3.7e-02 | -8.62  | 3.4e-02 | 0.14 | 6 | 33157138  | <i>COL11A2</i> | Body    | -0.23 | n | 0 |
| cg16507569 | ILMN_1721178 | -8.56  | 1.3e-02 | -0.86  | 3.5e-02 | 8.57   | 1.7e-02 | 0.15 | 6 | 33158020  | <i>COL11A2</i> | Body    | 0.27  | n | 0 |
| cg19628686 | ILMN_1721178 | -11.06 | 1.2e-02 | -9.5   | 1.4e-02 | 15.26  | 1.4e-02 | 0.12 | 6 | 33158503  | <i>COL11A2</i> | Body    | 0.12  | n | 0 |

|            |              |       |         |        |         |        |         |      |    |           |          |         |       |   |   |
|------------|--------------|-------|---------|--------|---------|--------|---------|------|----|-----------|----------|---------|-------|---|---|
| cg11700230 | ILMN_1721178 | 6.58  | 3.6e-02 | 3.51   | 3.9e-02 | -6.63  | 4.0e-02 | 0.07 | 6  | 33159353  | COL11A2  | Body    | -0.22 | n | 0 |
| cg26385062 | ILMN_1721178 | 6.61  | 2.6e-02 | 3.44   | 2.7e-02 | -6.78  | 2.7e-02 | 0.07 | 6  | 33159361  | COL11A2  | Body    | -0.2  | n | 0 |
| cg02452416 | ILMN_1748166 | -7.48 | 4.9e-02 | -1.09  | 3.2e-02 | 7.66   | 4.5e-02 | 0.09 | 6  | 33160450  | COL11A2  | TSS1500 | -0.04 | n | 0 |
| cg05615552 | ILMN_1748166 | -7.62 | 3.3e-02 | -0.95  | 2.2e-02 | 7.67   | 3.0e-02 | 0.09 | 6  | 33160952  | COL11A2  | TSS1500 | -0.15 | n | 0 |
| cg02764478 | ILMN_1696279 | 6.66  | 3.7e-02 | 1.85   | 4.9e-02 | -6.46  | 4.5e-02 | 0.14 | 6  | 100904316 | SIMI     | Body    | -0.1  | y | 1 |
| cg03511031 | ILMN_1728844 | -6.26 | 3.2e-02 | -9.48  | 3.3e-02 | 10.72  | 3.2e-02 | 0.07 | 7  | 157460477 | PTPRN2   | Body    | -0.13 | n | 0 |
| cg22623223 | ILMN_1728844 | 7.14  | 2.0e-02 | 1.77   | 2.0e-02 | -7.25  | 2.3e-02 | 0.1  | 7  | 157484045 | PTPRN2   | Body    | 0.04  | n | 0 |
| cg11872672 | ILMN_1728844 | -7.36 | 2.6e-02 | -5.7   | 3.7e-02 | 7.75   | 3.9e-02 | 0.36 | 7  | 157514730 | PTPRN2   | Body    | -0.23 | y | 0 |
| cg04237822 | ILMN_1728844 | -5.79 | 3.6e-02 | -3.63  | 3.7e-02 | 6.74   | 3.3e-02 | 0.07 | 7  | 157523541 | PTPRN2   | Body    | -0.06 | n | 0 |
| cg25821143 | ILMN_1728844 | -6.03 | 2.2e-02 | -6.93  | 2.5e-02 | 8.97   | 2.4e-02 | 0.08 | 7  | 157529705 | PTPRN2   | Body    | -0.04 | n | 0 |
| cg24935409 | ILMN_1728844 | 7.27  | 3.0e-02 | 2.32   | 2.7e-02 | -7.55  | 3.0e-02 | 0.07 | 7  | 157667762 | PTPRN2   | Body    | -0.02 | n | 0 |
| cg09845489 | ILMN_1728844 | 7.95  | 4.8e-03 | 1.46   | 5.1e-03 | -8.18  | 5.3e-03 | 0.12 | 7  | 157667853 | PTPRN2   | Body    | 0.14  | n | 0 |
| cg09350411 | ILMN_1728844 | 7.84  | 9.6e-03 | 4      | 9.1e-03 | -8.99  | 9.9e-03 | 0.1  | 7  | 157667935 | PTPRN2   | Body    | 0.07  | n | 0 |
| cg19013611 | ILMN_1728844 | 8.87  | 2.4e-03 | 1.84   | 2.1e-03 | -9.17  | 2.4e-03 | 0.13 | 7  | 157668051 | PTPRN2   | Body    | 0.08  | n | 0 |
| cg15298059 | ILMN_1728844 | 6.4   | 1.6e-02 | 1.25   | 1.6e-02 | -6.54  | 1.7e-02 | 0.09 | 7  | 157668141 | PTPRN2   | Body    | 0.1   | n | 0 |
| cg24241530 | ILMN_1728844 | -5.44 | 4.6e-02 | -7.93  | 4.9e-02 | 9.31   | 4.7e-02 | 0.06 | 7  | 158061820 | PTPRN2   | Body    | -0.07 | n | 0 |
| cg16419421 | ILMN_1728844 | -8.45 | 7.4e-03 | -10.72 | 7.4e-03 | 12.56  | 7.0e-03 | 0.11 | 7  | 158073079 | PTPRN2   | Body    | -0.17 | n | 0 |
| cg13409070 | ILMN_1728844 | 6.47  | 4.4e-02 | 7.83   | 3.9e-02 | -11.1  | 4.1e-02 | 0.07 | 7  | 158114558 | PTPRN2   | Body    | 0.19  | n | 0 |
| cg18566911 | ILMN_1728844 | -6.71 | 3.2e-02 | -14.74 | 3.6e-02 | 14.69  | 3.6e-02 | 0.08 | 7  | 158183784 | PTPRN2   | Body    | -0.24 | n | 0 |
| cg20764780 | ILMN_1728844 | -7.78 | 3.4e-02 | -3.18  | 3.6e-02 | 8.35   | 3.2e-02 | 0.08 | 7  | 158187725 | PTPRN2   | Body    | -0.06 | n | 0 |
| cg15035217 | ILMN_1728844 | -7.24 | 4.0e-02 | -10.89 | 4.6e-02 | 13.04  | 4.5e-02 | 0.09 | 7  | 158235051 | PTPRN2   | Body    | 0     | n | 0 |
| cg02512724 | ILMN_1728844 | 10.15 | 6.5e-03 | 9.86   | 6.5e-03 | -12.73 | 6.8e-03 | 0.11 | 7  | 158343573 | PTPRN2   | Body    | -0.18 | n | 0 |
| cg00841760 | ILMN_1728844 | -8.54 | 2.5e-02 | -2.71  | 2.8e-02 | 8.74   | 2.4e-02 | 0.07 | 7  | 158362966 | PTPRN2   | Body    | -0.09 | n | 0 |
| cg26180501 | ILMN_1728844 | -7.56 | 3.5e-02 | -3.93  | 4.2e-02 | 8.11   | 3.9e-02 | 0.08 | 7  | 158363265 | PTPRN2   | Body    | -0.09 | n | 0 |
| cg21325485 | ILMN_1728844 | -7.2  | 2.7e-02 | -3.91  | 3.2e-02 | 8.12   | 2.9e-02 | 0.09 | 7  | 158364932 | PTPRN2   | Body    | 0     | n | 0 |
| cg17949162 | ILMN_1796855 | 13.11 | 1.6e-02 | 1.51   | 9.1e-03 | -13.17 | 1.7e-02 | 0.11 | 10 | 121355153 | TIAL1    | Body    | 0.03  | y | 0 |
| cg19262958 | ILMN_1687958 | 4.49  | 4.8e-02 | 8.21   | 4.2e-02 | -9.57  | 3.8e-02 | 0.14 | 11 | 792861    | SLC25A22 | Body    | -0.02 | y | 0 |
| cg10970251 | ILMN_1687958 | -7.57 | 2.6e-02 | -2.73  | 1.7e-02 | 7.66   | 2.6e-02 | 0.11 | 11 | 796421    | SLC25A22 | TSS1500 | -0.11 | n | 0 |

|            |              |        |         |        |         |        |         |      |    |           |               |         |       |   |   |
|------------|--------------|--------|---------|--------|---------|--------|---------|------|----|-----------|---------------|---------|-------|---|---|
| cg11718501 | ILMN_1666310 | 5.18   | 4.2e-02 | 1.13   | 2.3e-02 | -5.09  | 4.1e-02 | 0.08 | 11 | 122850972 | <i>BSX</i>    | Body    | -0.21 | y | 0 |
| cg22345428 | ILMN_2352295 | -7     | 4.7e-02 | -1.32  | 3.7e-02 | 7.23   | 4.2e-02 | 0.1  | 11 | 129781496 | <i>PRDM10</i> | Body    | -0.06 | n | 0 |
| cg24937685 | ILMN_2352295 | 9.73   | 2.0e-02 | 9.39   | 2.1e-02 | -13.3  | 2.0e-02 | 0.08 | 11 | 129806002 | <i>PRDM10</i> | Body    | -0.04 | n | 0 |
| cg12284171 | ILMN_2352295 | 9.04   | 4.0e-02 | 11.04  | 3.9e-02 | -14.15 | 3.8e-02 | 0.08 | 11 | 129814770 | <i>PRDM10</i> | Body    | -0.03 | n | 0 |
| cg14082919 | ILMN_2352295 | 11.16  | 8.2e-03 | 14.14  | 7.3e-03 | -16.69 | 6.8e-03 | 0.17 | 11 | 129814820 | <i>PRDM10</i> | Body    | -0.17 | y | 0 |
| cg12409074 | ILMN_2352295 | -11.66 | 1.4e-02 | -3.15  | 1.3e-02 | 11.44  | 1.5e-02 | 0.1  | 11 | 129870648 | <i>PRDM10</i> | 5'UTR   | -0.16 | n | 0 |
| cg03198733 | ILMN_1781626 | -8.1   | 3.3e-02 | -8.59  | 3.8e-02 | 11.75  | 3.8e-02 | 0.11 | 12 | 7167584   | <i>CIS</i>    | TSS1500 | 0.02  | n | 0 |
| cg13053396 | ILMN_1781626 | -10.19 | 4.5e-03 | -8.53  | 5.1e-03 | 12.23  | 5.4e-03 | 0.15 | 12 | 7168545   | <i>CIS</i>    | 5'UTR   | -0.13 | y | 0 |
| cg20378628 | ILMN_1781626 | -8.86  | 1.5e-02 | -11.74 | 1.8e-02 | 15.48  | 1.8e-02 | 0.14 | 12 | 7169154   | <i>CIS</i>    | 5'UTR   | 0.14  | n | 0 |
| cg22509041 | ILMN_2119692 | 5.42   | 4.1e-02 | 1.18   | 2.4e-02 | -5.6   | 4.3e-02 | 0.09 | 12 | 53574524  | <i>CSAD</i>   | TSS200  | 0.15  | y | 0 |
| cg15817960 | ILMN_1719975 | -4.13  | 1.5e-02 | -1.1   | 2.2e-02 | 4.58   | 1.5e-02 | 0.08 | 12 | 54409599  | <i>HOXC4</i>  | TSS1500 | 0.31  | n | 0 |
| cg20381985 | ILMN_1719975 | -4.94  | 2.5e-02 | -3.59  | 3.3e-02 | 5.73   | 3.3e-02 | 0.12 | 12 | 54410662  | <i>HOXC4</i>  | 5'UTR   | -0.06 | n | 0 |
| cg09481972 | ILMN_1719975 | -5.66  | 1.5e-02 | -2.89  | 1.4e-02 | 6.25   | 1.3e-02 | 0.1  | 12 | 54410666  | <i>HOXC4</i>  | 5'UTR   | -0.08 | n | 0 |
| cg10918927 | ILMN_1719975 | -5     | 8.1e-03 | -3.62  | 7.7e-03 | 5.95   | 7.2e-03 | 0.1  | 12 | 54411193  | <i>HOXC4</i>  | 5'UTR   | -0.1  | n | 0 |
| cg16765387 | ILMN_1719975 | -5.3   | 7.1e-04 | -3.14  | 8.3e-04 | 5.9    | 7.2e-04 | 0.15 | 12 | 54411245  | <i>HOXC4</i>  | 5'UTR   | -0.09 | y | 0 |
| cg00506343 | ILMN_1719975 | -3.64  | 3.7e-02 | -1.64  | 3.0e-02 | 4.29   | 2.8e-02 | 0.11 | 12 | 54421033  | <i>HOXC4</i>  | 5'UTR   | 0.07  | n | 0 |
| cg19182597 | ILMN_1719975 | -3.71  | 1.9e-02 | -1.35  | 2.0e-02 | 4.17   | 1.7e-02 | 0.08 | 12 | 54426670  | <i>HOXC4</i>  | 5'UTR   | 0.14  | n | 0 |
| cg15244786 | ILMN_1719975 | 3.47   | 4.8e-02 | 2.16   | 4.6e-02 | -4.36  | 4.6e-02 | 0.06 | 12 | 54446279  | <i>HOXC4</i>  | 5'UTR   | 0.15  | n | 0 |
| cg22370252 | ILMN_1719975 | 3.57   | 3.9e-02 | 1.94   | 3.7e-02 | -4.37  | 3.7e-02 | 0.06 | 12 | 54446289  | <i>HOXC4</i>  | 5'UTR   | 0.18  | n | 0 |
| cg14233050 | ILMN_1684440 | 4.64   | 1.5e-02 | 15.22  | 1.3e-02 | -15.37 | 1.4e-02 | 0.11 | 12 | 120651871 | <i>PXN</i>    | Body    | -0.09 | n | 0 |
| cg01866518 | ILMN_1684440 | 4.36   | 3.2e-02 | 9.76   | 2.7e-02 | -10.63 | 2.9e-02 | 0.09 | 12 | 120673235 | <i>PXN</i>    | 5'UTR   | 0.01  | n | 0 |
| cg04256697 | ILMN_1684440 | 5.15   | 1.3e-02 | 3.05   | 8.5e-03 | -6.22  | 1.2e-02 | 0.11 | 12 | 120688557 | <i>PXN</i>    | Body    | 0.1   | y | 0 |
| cg17370322 | ILMN_1788457 | 7.85   | 1.4e-02 | 0.88   | 7.8e-03 | -7.95  | 1.5e-02 | 0.1  | 13 | 95953482  | <i>ABCC4</i>  | Body    | 0.16  | y | 0 |
| cg22853485 | ILMN_1663538 | -4.58  | 2.1e-02 | -1.76  | 1.5e-02 | 4.88   | 2.1e-02 | 0.09 | 13 | 100258524 | <i>CLYBL</i>  | TSS1500 | 0     | n | 0 |
| cg01726399 | ILMN_1663538 | -5.11  | 2.6e-02 | -2.1   | 1.8e-02 | 5.56   | 2.4e-02 | 0.09 | 13 | 100258641 | <i>CLYBL</i>  | TSS1500 | 0     | n | 0 |
| cg26867370 | ILMN_1663538 | 4.27   | 4.4e-02 | 6.12   | 4.4e-02 | -7.64  | 4.0e-02 | 0.08 | 13 | 100262973 | <i>CLYBL</i>  | Body    | 0.01  | n | 0 |
| cg03261783 | ILMN_1663538 | 4.66   | 2.3e-02 | 10.68  | 2.1e-02 | -11.42 | 1.9e-02 | 0.1  | 13 | 100497453 | <i>CLYBL</i>  | Body    | -0.09 | n | 0 |
| cg26862247 | ILMN_1663538 | 4.36   | 4.1e-02 | 14.09  | 3.6e-02 | -15.19 | 3.5e-02 | 0.09 | 13 | 100497665 | <i>CLYBL</i>  | Body    | 0.07  | n | 0 |

|            |              |        |         |        |         |        |         |      |    |           |         |         |       |   |   |
|------------|--------------|--------|---------|--------|---------|--------|---------|------|----|-----------|---------|---------|-------|---|---|
| cg00130181 | ILMN_1663538 | 5.02   | 1.3e-02 | 9.05   | 1.2e-02 | -10.46 | 1.1e-02 | 0.12 | 13 | 100517033 | CLYBL   | Body    | -0.01 | n | 0 |
| cg04259706 | ILMN_1712088 | -7.93  | 3.8e-02 | -9.68  | 3.8e-02 | 12.42  | 3.9e-02 | 0.06 | 13 | 100545517 | CLYBL   | 3'UTR   | 0     | n | 0 |
| cg00743094 | ILMN_1663538 | -3.09  | 4.3e-02 | -1.21  | 7.3e-03 | 3.9    | 1.7e-02 | 0.39 | 13 | 100547968 | CLYBL   | 3'UTR   | 0.09  | y | 0 |
| cg10912240 | ILMN_2149946 | -5.43  | 3.2e-02 | -1.76  | 2.4e-02 | 5.99   | 2.6e-02 | 0.11 | 14 | 29235907  | FOXG1   | TSS1500 | 0.06  | y | 1 |
| cg08198377 | ILMN_1691181 | -3.6   | 2.7e-02 | -1.84  | 3.2e-02 | 3.62   | 2.8e-02 | 0.07 | 14 | 51707975  | TMX1    | Body    | -0.24 | y | 0 |
| cg06799422 | ILMN_2372379 | 7.08   | 1.7e-02 | 1.54   | 1.7e-02 | -7     | 2.3e-02 | 0.19 | 15 | 41952235  | MGA     | TSS1500 | 0.07  | y | 1 |
| cg03752425 | ILMN_1808587 | 5.51   | 4.3e-02 | 9.85   | 3.6e-02 | -11.77 | 3.7e-02 | 0.09 | 16 | 72840504  | ZFHX3   | Body    | 0.1   | n | 0 |
| cg08858926 | ILMN_1808587 | -7.5   | 8.9e-03 | -3.74  | 1.2e-02 | 7.97   | 1.0e-02 | 0.12 | 16 | 72918832  | ZFHX3   | Body    | -0.09 | y | 0 |
| cg10415570 | ILMN_1808587 | -9.11  | 7.6e-03 | -16.32 | 8.7e-03 | 17.43  | 8.5e-03 | 0.12 | 16 | 73053779  | ZFHX3   | 5'UTR   | -0.15 | n | 0 |
| cg03891962 | ILMN_1690465 | -9.26  | 9.9e-04 | -11.7  | 1.1e-03 | 16.49  | 1.1e-03 | 0.15 | 16 | 89336560  | ANKRD11 | Body    | 0.23  | n | 0 |
| cg02033182 | ILMN_1690465 | -6.41  | 4.2e-02 | -7.52  | 4.0e-02 | 10.18  | 4.1e-02 | 0.06 | 16 | 89337334  | ANKRD11 | Body    | 0.06  | n | 0 |
| cg03594907 | ILMN_1690465 | -7.46  | 1.8e-02 | -15.46 | 2.3e-02 | 17.83  | 2.2e-02 | 0.13 | 16 | 89337953  | ANKRD11 | Body    | 0.12  | n | 0 |
| cg09474599 | ILMN_1690465 | -6.09  | 3.7e-02 | -14.32 | 3.8e-02 | 15.78  | 3.8e-02 | 0.06 | 16 | 89338043  | ANKRD11 | Body    | 0.04  | n | 0 |
| cg04381043 | ILMN_1690465 | -10.15 | 9.6e-04 | -22.02 | 1.1e-03 | 24.72  | 1.1e-03 | 0.17 | 16 | 89341467  | ANKRD11 | Body    | 0.06  | n | 0 |
| cg06098690 | ILMN_1690465 | -11.53 | 2.3e-04 | -30.12 | 2.5e-04 | 32.88  | 2.5e-04 | 0.18 | 16 | 89341682  | ANKRD11 | Body    | 0.06  | n | 0 |
| cg10256077 | ILMN_1690465 | -7.66  | 3.0e-02 | -14.61 | 2.9e-02 | 17.7   | 3.0e-02 | 0.07 | 16 | 89341851  | ANKRD11 | Body    | 0.18  | n | 0 |
| cg26479658 | ILMN_1690465 | -10.83 | 3.7e-03 | -19.06 | 4.4e-03 | 22.54  | 4.4e-03 | 0.15 | 16 | 89342677  | ANKRD11 | Body    | 0.08  | n | 0 |
| cg09867358 | ILMN_1690465 | -8.95  | 8.5e-04 | -20.83 | 1.0e-03 | 22.3   | 1.0e-03 | 0.16 | 16 | 89342851  | ANKRD11 | Body    | -0.04 | n | 0 |
| cg08927754 | ILMN_1690465 | -6.12  | 3.5e-02 | -8.86  | 3.8e-02 | 11.28  | 3.8e-02 | 0.07 | 16 | 89344197  | ANKRD11 | Body    | 0.12  | n | 0 |
| cg26747517 | ILMN_1690465 | -6.86  | 1.3e-02 | -9.92  | 1.3e-02 | 12.05  | 1.4e-02 | 0.09 | 16 | 89344383  | ANKRD11 | Body    | 0.01  | n | 0 |
| cg11051669 | ILMN_1690465 | -7.72  | 1.0e-02 | -17.16 | 1.2e-02 | 19.65  | 1.2e-02 | 0.11 | 16 | 89346436  | ANKRD11 | Body    | 0.13  | n | 0 |
| cg00679681 | ILMN_1690465 | -14.87 | 5.5e-05 | -41.63 | 6.1e-05 | 44.5   | 6.1e-05 | 0.22 | 16 | 89346491  | ANKRD11 | Body    | 0.03  | n | 0 |
| cg04949226 | ILMN_1690465 | -9.23  | 4.4e-03 | -23.53 | 5.2e-03 | 25.4   | 5.2e-03 | 0.13 | 16 | 89348469  | ANKRD11 | Body    | 0.02  | n | 0 |
| cg03362018 | ILMN_1690465 | -7.22  | 3.0e-02 | -15.58 | 3.3e-02 | 17.77  | 3.3e-02 | 0.08 | 16 | 89348956  | ANKRD11 | Body    | 0.1   | n | 0 |
| cg09301471 | ILMN_1690465 | -6.31  | 4.3e-02 | -13.22 | 4.9e-02 | 14.94  | 4.9e-02 | 0.09 | 16 | 89349945  | ANKRD11 | Body    | 0.07  | n | 0 |
| cg02500806 | ILMN_1690465 | -6.35  | 3.0e-02 | -10.43 | 3.1e-02 | 12.32  | 3.1e-02 | 0.07 | 16 | 89349976  | ANKRD11 | Body    | 0.03  | n | 0 |
| cg06636372 | ILMN_1690465 | -10.23 | 6.0e-04 | -15.95 | 7.3e-04 | 19.48  | 7.3e-04 | 0.18 | 16 | 89349979  | ANKRD11 | Body    | 0.08  | n | 0 |
| cg08130612 | ILMN_1690465 | -5.88  | 1.8e-02 | -11.97 | 2.2e-02 | 13.52  | 2.2e-02 | 0.12 | 16 | 89350233  | ANKRD11 | Body    | 0.06  | n | 0 |



|            |              |       |         |        |         |       |         |      |    |          |                |       |      |   |   |
|------------|--------------|-------|---------|--------|---------|-------|---------|------|----|----------|----------------|-------|------|---|---|
| cg00199000 | ILMN_1690465 | -6.7  | 3.1e-02 | -11.34 | 3.4e-02 | 13.66 | 3.4e-02 | 0.08 | 16 | 89350310 | <i>ANKRD11</i> | Body  | 0.1  | n | 0 |
| cg04937029 | ILMN_1690465 | -5.69 | 3.8e-02 | -11.03 | 4.4e-02 | 12.79 | 4.4e-02 | 0.08 | 16 | 89351359 | <i>ANKRD11</i> | Body  | 0.09 | n | 0 |
| cg16593941 | ILMN_1690465 | -8.26 | 2.0e-02 | -19.78 | 2.6e-02 | 22.1  | 2.6e-02 | 0.19 | 16 | 89351893 | <i>ANKRD11</i> | Body  | 0.11 | n | 0 |
| cg02134790 | ILMN_1690465 | -7.5  | 3.6e-03 | -19.32 | 4.4e-03 | 21.89 | 4.4e-03 | 0.14 | 16 | 89352812 | <i>ANKRD11</i> | Body  | 0.18 | n | 0 |
| cg09274451 | ILMN_1690465 | -7.96 | 9.7e-03 | -13.99 | 1.2e-02 | 16.27 | 1.2e-02 | 0.14 | 16 | 89353600 | <i>ANKRD11</i> | Body  | 0.04 | n | 0 |
| cg07159469 | ILMN_1690465 | -6.66 | 1.7e-02 | -19.94 | 2.2e-02 | 21.8  | 2.2e-02 | 0.14 | 16 | 89355005 | <i>ANKRD11</i> | Body  | 0.14 | n | 0 |
| cg03317919 | ILMN_1690465 | -7.57 | 1.3e-02 | -16.8  | 1.3e-02 | 19.34 | 1.4e-02 | 0.09 | 16 | 89355071 | <i>ANKRD11</i> | Body  | 0.14 | n | 0 |
| cg01875529 | ILMN_1690465 | -8.84 | 6.4e-03 | -18.53 | 7.0e-03 | 21.95 | 7.0e-03 | 0.11 | 16 | 89355462 | <i>ANKRD11</i> | Body  | 0.19 | n | 0 |
| cg09875780 | ILMN_1690465 | -6.24 | 3.7e-02 | -15.27 | 4.5e-02 | 17.2  | 4.4e-02 | 0.11 | 16 | 89357086 | <i>ANKRD11</i> | Body  | 0.14 | n | 0 |
| cg09776094 | ILMN_1690465 | -8.56 | 1.6e-02 | -15.39 | 1.8e-02 | 19.01 | 1.7e-02 | 0.1  | 16 | 89357477 | <i>ANKRD11</i> | Body  | 0.2  | n | 0 |
| cg27207530 | ILMN_1690465 | -9.21 | 5.8e-03 | -17.17 | 6.9e-03 | 21    | 6.8e-03 | 0.13 | 16 | 89357600 | <i>ANKRD11</i> | Body  | 0.21 | n | 0 |
| cg09220891 | ILMN_1690465 | -8.04 | 3.5e-02 | -9.55  | 3.7e-02 | 13.01 | 3.8e-02 | 0.07 | 16 | 89357741 | <i>ANKRD11</i> | Body  | 0.1  | n | 0 |
| cg02487202 | ILMN_1690465 | -8.56 | 4.4e-03 | -14.48 | 5.3e-03 | 17.83 | 5.3e-03 | 0.14 | 16 | 89358232 | <i>ANKRD11</i> | Body  | 0.16 | n | 0 |
| cg03025000 | ILMN_1690465 | -9.68 | 4.3e-03 | -15.69 | 5.0e-03 | 20.01 | 5.0e-03 | 0.13 | 16 | 89358837 | <i>ANKRD11</i> | Body  | 0.21 | n | 0 |
| cg27267258 | ILMN_1690465 | -6.83 | 1.6e-02 | -15.93 | 1.8e-02 | 18.93 | 1.8e-02 | 0.08 | 16 | 89359175 | <i>ANKRD11</i> | Body  | 0.28 | n | 0 |
| cg07108351 | ILMN_1690465 | -8.43 | 1.5e-03 | -18.56 | 1.8e-03 | 21.66 | 1.7e-03 | 0.15 | 16 | 89359631 | <i>ANKRD11</i> | Body  | 0.18 | n | 0 |
| cg00332509 | ILMN_1690465 | -8.49 | 5.4e-03 | -16.05 | 6.0e-03 | 19.51 | 5.9e-03 | 0.11 | 16 | 89363830 | <i>ANKRD11</i> | Body  | 0.2  | n | 0 |
| cg09607566 | ILMN_1690465 | -6.93 | 2.6e-02 | -10.52 | 3.1e-02 | 13.25 | 3.1e-02 | 0.11 | 16 | 89367323 | <i>ANKRD11</i> | Body  | 0.14 | n | 0 |
| cg26783123 | ILMN_1690465 | -6.31 | 3.9e-02 | -7.23  | 4.7e-02 | 9.85  | 4.7e-02 | 0.11 | 16 | 89367859 | <i>ANKRD11</i> | Body  | 0.09 | n | 0 |
| cg16699022 | ILMN_1690465 | -7.06 | 1.3e-02 | -17.17 | 1.6e-02 | 19.38 | 1.6e-02 | 0.12 | 16 | 89371566 | <i>ANKRD11</i> | Body  | 0.14 | n | 0 |
| cg00711584 | ILMN_1690465 | -7.35 | 1.2e-02 | -24.95 | 1.4e-02 | 26.56 | 1.4e-02 | 0.11 | 16 | 89373295 | <i>ANKRD11</i> | Body  | 0.09 | n | 0 |
| cg07661162 | ILMN_1690465 | -6.13 | 1.3e-02 | -11.16 | 1.6e-02 | 13.84 | 1.5e-02 | 0.1  | 16 | 89375203 | <i>ANKRD11</i> | Body  | 0.23 | n | 0 |
| cg03615921 | ILMN_1690465 | -8.33 | 7.6e-03 | -22.05 | 9.8e-03 | 24.46 | 9.7e-03 | 0.16 | 16 | 89375284 | <i>ANKRD11</i> | Body  | 0.13 | n | 0 |
| cg02415470 | ILMN_1690465 | -6.3  | 2.4e-02 | -10.52 | 2.4e-02 | 13.77 | 2.4e-02 | 0.07 | 16 | 89383614 | <i>ANKRD11</i> | 5'UTR | 0.3  | n | 0 |
| cg26546229 | ILMN_1690465 | -8.22 | 4.5e-03 | -18.25 | 5.3e-03 | 20.17 | 5.4e-03 | 0.14 | 16 | 89385611 | <i>ANKRD11</i> | 5'UTR | 0.03 | n | 0 |
| cg08888321 | ILMN_1690465 | -7.26 | 4.8e-03 | -13.39 | 5.4e-03 | 15.32 | 5.4e-03 | 0.12 | 16 | 89385892 | <i>ANKRD11</i> | 5'UTR | 0.02 | n | 0 |
| cg27247807 | ILMN_1690465 | -9.45 | 5.6e-04 | -16.47 | 6.1e-04 | 20.41 | 6.1e-04 | 0.16 | 16 | 89387225 | <i>ANKRD11</i> | 5'UTR | 0.19 | n | 0 |
| cg27300957 | ILMN_1690465 | -9.8  | 7.5e-04 | -11.77 | 1.0e-03 | 15.85 | 1.0e-03 | 0.21 | 16 | 89387418 | <i>ANKRD11</i> | 5'UTR | 0.1  | n | 0 |

|            |              |        |         |        |         |        |         |      |    |          |                |       |       |   |   |
|------------|--------------|--------|---------|--------|---------|--------|---------|------|----|----------|----------------|-------|-------|---|---|
| cg09420319 | ILMN_1690465 | -7.83  | 4.6e-02 | -17.1  | 4.8e-02 | 19.92  | 4.8e-02 | 0.06 | 16 | 89387569 | <i>ANKRD11</i> | 5'UTR | 0.17  | n | 0 |
| cg08311935 | ILMN_1690465 | -7.5   | 5.2e-03 | -9.65  | 5.8e-03 | 12.74  | 5.8e-03 | 0.12 | 16 | 89387805 | <i>ANKRD11</i> | 5'UTR | 0.1   | n | 0 |
| cg05504729 | ILMN_1690465 | -7.94  | 1.8e-02 | -4.04  | 2.1e-02 | 8.9    | 2.1e-02 | 0.11 | 16 | 89399490 | <i>ANKRD11</i> | 5'UTR | 0.05  | n | 0 |
| cg07054502 | ILMN_1690465 | -10.71 | 3.3e-04 | -7.8   | 4.4e-04 | 13.88  | 4.3e-04 | 0.2  | 16 | 89405478 | <i>ANKRD11</i> | 5'UTR | 0.13  | n | 0 |
| cg06873916 | ILMN_1690465 | -7.86  | 2.7e-02 | -17.56 | 3.1e-02 | 19.98  | 3.1e-02 | 0.11 | 16 | 89410196 | <i>ANKRD11</i> | 5'UTR | 0.12  | n | 0 |
| cg05071195 | ILMN_1690465 | -7.12  | 7.7e-03 | -10.31 | 7.9e-03 | 13.55  | 7.9e-03 | 0.1  | 16 | 89411232 | <i>ANKRD11</i> | 5'UTR | 0.19  | n | 0 |
| cg01271982 | ILMN_1690465 | -8.03  | 2.4e-03 | -16.39 | 2.8e-03 | 18.96  | 2.8e-03 | 0.13 | 16 | 89417545 | <i>ANKRD11</i> | 5'UTR | 0.11  | n | 0 |
| cg00911267 | ILMN_1690465 | -10.89 | 4.1e-04 | -10.97 | 5.4e-04 | 16.4   | 5.3e-04 | 0.2  | 16 | 89418486 | <i>ANKRD11</i> | 5'UTR | 0.15  | n | 0 |
| cg05507697 | ILMN_1690465 | -9.42  | 7.2e-05 | -11.21 | 9.0e-05 | 16.09  | 8.7e-05 | 0.21 | 16 | 89421700 | <i>ANKRD11</i> | 5'UTR | 0.22  | n | 0 |
| cg06411447 | ILMN_1690465 | -9.02  | 4.9e-03 | -8.64  | 6.5e-03 | 13.48  | 6.2e-03 | 0.17 | 16 | 89421749 | <i>ANKRD11</i> | 5'UTR | 0.2   | n | 0 |
| cg01619533 | ILMN_1690465 | -8.43  | 2.8e-03 | -11.46 | 3.1e-03 | 15.86  | 3.1e-03 | 0.13 | 16 | 89421770 | <i>ANKRD11</i> | 5'UTR | 0.26  | n | 0 |
| cg02749356 | ILMN_1690465 | -11.39 | 1.0e-04 | -22.64 | 1.2e-04 | 26.85  | 1.2e-04 | 0.21 | 16 | 89421929 | <i>ANKRD11</i> | 5'UTR | 0.16  | n | 0 |
| cg26533023 | ILMN_1690465 | -8.69  | 3.9e-03 | -22.59 | 4.5e-03 | 25.45  | 4.5e-03 | 0.12 | 16 | 89422171 | <i>ANKRD11</i> | 5'UTR | 0.17  | n | 0 |
| cg00345343 | ILMN_1690465 | -6.81  | 9.4e-03 | -13.4  | 1.4e-02 | 15.61  | 1.4e-02 | 0.2  | 16 | 89422185 | <i>ANKRD11</i> | 5'UTR | 0.12  | n | 0 |
| cg27096292 | ILMN_1690465 | -9.3   | 1.4e-03 | -19.94 | 1.8e-03 | 23.07  | 1.7e-03 | 0.16 | 16 | 89422212 | <i>ANKRD11</i> | 5'UTR | 0.14  | n | 0 |
| cg00948881 | ILMN_1690465 | -7.3   | 3.3e-02 | -15.04 | 3.8e-02 | 17.18  | 3.8e-02 | 0.11 | 16 | 89433544 | <i>ANKRD11</i> | 5'UTR | 0.09  | n | 0 |
| cg26877336 | ILMN_1690465 | -5.83  | 2.0e-02 | -11.02 | 2.2e-02 | 12.84  | 2.2e-02 | 0.08 | 16 | 89433760 | <i>ANKRD11</i> | 5'UTR | 0.09  | n | 0 |
| cg06660116 | ILMN_1690465 | -6.98  | 1.4e-02 | -13.43 | 1.4e-02 | 16.38  | 1.4e-02 | 0.08 | 16 | 89433876 | <i>ANKRD11</i> | 5'UTR | 0.21  | n | 0 |
| cg08420923 | ILMN_1690465 | -10.18 | 2.6e-03 | -9.58  | 2.3e-03 | 15.23  | 2.4e-03 | 0.13 | 16 | 89436447 | <i>ANKRD11</i> | 5'UTR | 0.18  | n | 1 |
| cg09033641 | ILMN_1690465 | -7.63  | 3.5e-02 | -10.07 | 3.8e-02 | 13.47  | 3.8e-02 | 0.08 | 16 | 89436838 | <i>ANKRD11</i> | 5'UTR | 0.16  | n | 0 |
| cg10515125 | ILMN_1690465 | -11.73 | 1.5e-04 | -30.19 | 1.7e-04 | 33.38  | 1.7e-04 | 0.19 | 16 | 89437361 | <i>ANKRD11</i> | 5'UTR | 0.1   | n | 0 |
| cg03633073 | ILMN_1690465 | -8     | 1.4e-02 | -33.21 | 1.8e-02 | 34.58  | 1.8e-02 | 0.18 | 16 | 89437518 | <i>ANKRD11</i> | 5'UTR | 0.07  | n | 0 |
| cg12069856 | ILMN_1690465 | -9.24  | 3.8e-03 | -16.98 | 5.1e-03 | 20.37  | 5.1e-03 | 0.19 | 16 | 89438504 | <i>ANKRD11</i> | 5'UTR | 0.15  | n | 0 |
| cg07447015 | ILMN_1690465 | -9.24  | 2.4e-03 | -20.19 | 2.6e-03 | 23.64  | 2.6e-03 | 0.13 | 16 | 89438597 | <i>ANKRD11</i> | 5'UTR | 0.18  | n | 0 |
| cg08822215 | ILMN_2108709 | 11.47  | 2.5e-02 | 8.75   | 3.0e-02 | -14.03 | 2.4e-02 | 0.18 | 16 | 89438651 | <i>ANKRD11</i> | 5'UTR | -0.09 | n | 0 |
| cg08822215 | ILMN_1690465 | -8.8   | 3.6e-04 | -12.52 | 3.7e-04 | 14.88  | 3.8e-04 | 0.17 | 16 | 89438651 | <i>ANKRD11</i> | 5'UTR | -0.05 | n | 0 |
| cg01881136 | ILMN_1690465 | -9.1   | 1.6e-03 | -28.38 | 2.1e-03 | 30.59  | 2.1e-03 | 0.19 | 16 | 89438758 | <i>ANKRD11</i> | 5'UTR | 0.1   | n | 0 |
| cg09537792 | ILMN_1690465 | -8.49  | 8.0e-03 | -21.08 | 8.8e-03 | 23.18  | 8.8e-03 | 0.11 | 16 | 89438892 | <i>ANKRD11</i> | 5'UTR | 0.07  | n | 0 |

|            |              |        |         |        |         |        |         |      |    |          |                |       |       |   |   |
|------------|--------------|--------|---------|--------|---------|--------|---------|------|----|----------|----------------|-------|-------|---|---|
| cg08417142 | ILMN_1690465 | -9.88  | 2.5e-04 | -21.6  | 2.9e-04 | 25.4   | 2.9e-04 | 0.19 | 16 | 89439771 | <i>ANKRD11</i> | 5'UTR | 0.2   | n | 0 |
| cg08549241 | ILMN_1690465 | -8.03  | 2.3e-02 | -8.35  | 2.7e-02 | 12.4   | 2.7e-02 | 0.1  | 16 | 89440133 | <i>ANKRD11</i> | 5'UTR | 0.17  | n | 0 |
| cg05638739 | ILMN_1690465 | -10.44 | 4.4e-05 | -12.94 | 5.4e-05 | 18     | 5.3e-05 | 0.22 | 16 | 89440324 | <i>ANKRD11</i> | 5'UTR | 0.19  | y | 0 |
| cg16525838 | ILMN_1690465 | -8.56  | 4.9e-03 | -11.02 | 5.7e-03 | 14.94  | 5.7e-03 | 0.12 | 16 | 89440460 | <i>ANKRD11</i> | 5'UTR | 0.17  | n | 0 |
| cg00770754 | ILMN_1690465 | -16.53 | 5.2e-03 | -16.08 | 5.0e-03 | 22.83  | 5.1e-03 | 0.11 | 16 | 89440949 | <i>ANKRD11</i> | 5'UTR | -0.02 | n | 0 |
| cg26946905 | ILMN_1690465 | -8.31  | 3.3e-03 | -15.14 | 3.7e-03 | 17.7   | 3.7e-03 | 0.13 | 16 | 89441595 | <i>ANKRD11</i> | 5'UTR | 0.07  | n | 0 |
| cg02582213 | ILMN_1690465 | -7.22  | 8.0e-03 | -13.71 | 1.0e-02 | 15.28  | 1.0e-02 | 0.16 | 16 | 89441654 | <i>ANKRD11</i> | 5'UTR | -0.01 | n | 0 |
| cg00926926 | ILMN_1690465 | -10.57 | 2.9e-04 | -28.55 | 3.6e-04 | 31.88  | 3.5e-04 | 0.19 | 16 | 89445433 | <i>ANKRD11</i> | 5'UTR | 0.16  | n | 0 |
| cg08595667 | ILMN_1690465 | -7.38  | 8.7e-04 | -21.33 | 1.3e-03 | 23.24  | 1.3e-03 | 0.21 | 16 | 89445453 | <i>ANKRD11</i> | 5'UTR | 0.11  | n | 0 |
| cg00488747 | ILMN_1690465 | -9.12  | 1.2e-03 | -17.53 | 1.5e-03 | 20.63  | 1.5e-03 | 0.16 | 16 | 89445503 | <i>ANKRD11</i> | 5'UTR | 0.12  | n | 0 |
| cg03484438 | ILMN_1690465 | -7.55  | 5.0e-03 | -11.85 | 7.4e-03 | 14.59  | 7.3e-03 | 0.21 | 16 | 89452237 | <i>ANKRD11</i> | 5'UTR | 0.12  | n | 0 |
| cg02013146 | ILMN_1690465 | -10.27 | 1.3e-03 | -26.97 | 1.4e-03 | 29.48  | 1.4e-03 | 0.15 | 16 | 89452259 | <i>ANKRD11</i> | 5'UTR | 0.07  | n | 0 |
| cg09823077 | ILMN_1690465 | -6.91  | 1.2e-02 | -15.37 | 1.6e-02 | 17.62  | 1.6e-02 | 0.13 | 16 | 89452360 | <i>ANKRD11</i> | 5'UTR | 0.14  | n | 0 |
| cg06270206 | ILMN_1690465 | -6.71  | 1.7e-02 | -11.32 | 2.3e-02 | 14.8   | 2.2e-02 | 0.13 | 16 | 89455108 | <i>ANKRD11</i> | 5'UTR | 0.32  | n | 0 |
| cg02226192 | ILMN_1746706 | -8.33  | 2.6e-02 | -3.23  | 1.6e-02 | 8.2    | 2.8e-02 | 0.15 | 16 | 89461734 | <i>ANKRD11</i> | 5'UTR | -0.18 | n | 0 |
| cg06365976 | ILMN_1690465 | -6.42  | 9.6e-03 | -17.4  | 1.3e-02 | 17.94  | 1.4e-02 | 0.17 | 16 | 89462292 | <i>ANKRD11</i> | 5'UTR | -0.08 | n | 0 |
| cg07118196 | ILMN_1690465 | -9.88  | 3.0e-03 | -16.08 | 3.1e-03 | 20.29  | 3.2e-03 | 0.12 | 16 | 89462418 | <i>ANKRD11</i> | 5'UTR | 0.18  | n | 0 |
| cg05900234 | ILMN_1690465 | -10.5  | 2.4e-03 | -17.94 | 2.7e-03 | 22.35  | 2.7e-03 | 0.13 | 16 | 89462661 | <i>ANKRD11</i> | 5'UTR | 0.19  | n | 0 |
| cg03258727 | ILMN_1690465 | -6.69  | 2.0e-02 | -10.94 | 2.4e-02 | 12.88  | 2.4e-02 | 0.12 | 16 | 89462782 | <i>ANKRD11</i> | 5'UTR | 0.04  | n | 0 |
| cg07746351 | ILMN_1690465 | -11.51 | 1.9e-03 | -17.99 | 2.1e-03 | 22.41  | 2.1e-03 | 0.15 | 16 | 89466392 | <i>ANKRD11</i> | 5'UTR | 0.12  | n | 0 |
| cg04340114 | ILMN_1690465 | -6.21  | 2.5e-02 | -12.95 | 3.1e-02 | 14.76  | 3.1e-02 | 0.11 | 16 | 89468673 | <i>ANKRD11</i> | 5'UTR | 0.09  | n | 0 |
| cg00206490 | ILMN_1746706 | -9.67  | 3.8e-02 | -1.98  | 1.9e-02 | 9.54   | 3.4e-02 | 0.17 | 16 | 89469729 | <i>ANKRD11</i> | 5'UTR | -0.27 | n | 0 |
| cg09293925 | ILMN_1690465 | -5.84  | 1.5e-02 | -10.92 | 1.6e-02 | 13.01  | 1.6e-02 | 0.08 | 16 | 89471650 | <i>ANKRD11</i> | 5'UTR | 0.13  | n | 0 |
| cg05749855 | ILMN_1690465 | -8.36  | 4.2e-03 | -22.13 | 5.3e-03 | 24.35  | 5.3e-03 | 0.15 | 16 | 89472771 | <i>ANKRD11</i> | 5'UTR | 0.1   | n | 0 |
| cg09486407 | ILMN_1690465 | -10.93 | 4.4e-04 | -20.13 | 5.7e-04 | 24.75  | 5.6e-04 | 0.2  | 16 | 89478268 | <i>ANKRD11</i> | 5'UTR | 0.21  | n | 0 |
| cg09222577 | ILMN_2108709 | 10.15  | 3.7e-02 | 6.2    | 4.6e-02 | -11.88 | 3.6e-02 | 0.17 | 16 | 89480222 | <i>ANKRD11</i> | 5'UTR | -0.04 | n | 0 |
| cg09222577 | ILMN_1690465 | -6     | 3.9e-02 | -6.87  | 3.9e-02 | 9.39   | 4.0e-02 | 0.06 | 16 | 89480222 | <i>ANKRD11</i> | 5'UTR | 0.07  | n | 0 |
| cg09222577 | ILMN_1746706 | 7.38   | 3.6e-02 | 5.96   | 4.4e-02 | -9.88  | 3.5e-02 | 0.13 | 16 | 89480222 | <i>ANKRD11</i> | 5'UTR | 0.04  | n | 0 |



Supplementary Table S3 Literature-based assessment of the functional role of age-related eCpG genes in adipose tissue and obesity

| Gene                                                | Max.<br>R2 | Methylation | SNP | Transcript | Animal      | Role (functional)                                                     | Notes                                                                                                                                                                      | References |
|-----------------------------------------------------|------------|-------------|-----|------------|-------------|-----------------------------------------------------------------------|----------------------------------------------------------------------------------------------------------------------------------------------------------------------------|------------|
| <i>ANKRD11</i>                                      |            |             |     |            |             |                                                                       |                                                                                                                                                                            |            |
| <i>COL11A2</i>                                      | 0.5        | yes         | yes | yes        | human/pig   | part of collagen involved in structure and strength of tissue support | 1. epigenetically associated with MetS and 2. insulin resistance in visceral fat from obese subjects 3. upregulated in fat pig breed (JNP)                                 | [36,37]    |
| <i>C1s</i>                                          | 0.54       |             |     | yes        | human       | part of complement system involved in inflammation                    | 1. upregulated in adipose tissue in heavier BMI co-twins, 2. upregulated in adipose tissue in obese males                                                                  | [38]       |
| <i>CPEB2</i>                                        |            |             |     |            |             |                                                                       |                                                                                                                                                                            |            |
| <i>TOX2</i>                                         |            |             |     |            |             |                                                                       |                                                                                                                                                                            |            |
| <i>KCNS1</i>                                        |            |             |     |            |             |                                                                       |                                                                                                                                                                            |            |
| <i>FHL2</i>                                         | 0.31       | yes         | yes | yes        | human/mouse | regulation of intracellular signal transduction pathways              | 1. hyper-methylation is associated with human aging and increase gene expression in blood and adipose, 2. FHL2 methylation in both blood and adipose associated with aging | [39]       |
| <i>TIAL1</i>                                        |            |             |     |            |             |                                                                       |                                                                                                                                                                            |            |
| <i>BSX</i>                                          |            |             |     |            |             |                                                                       |                                                                                                                                                                            |            |
| <i>PTPRN</i>                                        |            |             |     |            |             |                                                                       |                                                                                                                                                                            |            |
| search terms "gene AND obesity", "gene AND adipose" |            |             |     |            |             |                                                                       |                                                                                                                                                                            |            |
